# Supplementary material
Source: publisher figshare collection journal article supplement (https://tandf.figshare.com/ndownloader/files/18726080)
Supplement: Supplementary file 1 [file 18726080]

**Supplementary table.** Comparing parameters for relapsing disease among 298 HSP patients who had been followed up for at least 12 months

| **Clinical parameters** | | **Relapse** | | **p value** |
| --- | --- | --- | --- | --- |
| Yes (n=63) | No (n=235) |
| Age at disease onset, mean±SD | | 8.7±3.5 | 7.4±2.9 | **0.008** |
| Gender (F/M), n (%) | | 36(57.1)/27(42.9) | 130 (55.3)/105(44.7) | 0.887 |
| Preceding infection, n (%) | | 35 (55.6) | 151 (64.3) | 0.241 |
| Arthritis/arthralgia, n (%) | | 31(49.2) | 137 (58.3) | 0.202 |
| Abdominal pain, n (%) | | 36 (57.1) | 146 (62.1) | 0.471 |
| Intussusception, n (%) | | 5 (7.9) | 10 (4.3) | 0.325 |
| Severe GI involvement, n (%) | | 22 (34.9) | 101 (43) | 0.313 |
| Subcutaneous edema, n (%) | Total | 11 (17.5) | 84 (35.7) | **0.006** |
| Subcutaneous edema of extremities | 8 (12.7) | 70 (29.8) | **0.006** |
| Periorbital/scalp edema | 5 (7.9) | 18 (7.7) | 0.562 |
| Renal involvement, n (%) | | 17 (27) | 67 (28.5) | 0.876 |
| Biopsy-proven nephritis, n (%) | | 4 (6.3) | 18 (7.7) | 0.486 |
| Systemic steroid administration, n (%) | | 30 (47.6) | 128 (54.5) | 0.394 |
| **Laboratory parameters** | |  | |  |
| Hemoglobin (g/L) | | 12.4±1.5 | 12.2±1.1 | 0.316 |
| Leukocytes (/mm3) | | 11800±4309 | 11600±4137 | 0.713 |
| Thrombocytes (/mm3) | | 369000±116451 | 393000±122721 | 0.165 |
| ESR (mm/1st h) | | 15.1±15.6 | 19.9±17.5 | 0.077 |
| CRP (mg/dl) | | 1.01±1.65 | 1.65±2.74 | 0.111 |
| C3 (mg/dl) | | 141.5±30.4 | 151.4±32.8 | **0.032** |
| C4 (mg/dl) | | 27.7±9.1 | 30.1±10.1 | 0.076 |
| IgG (mg/dl) | | 1060.1±306.2 | 1117.1±328.4 | 0.216 |
| IgA (mg/dl) | | 206±87.9 | 1959.8±121.8 | 0.472 |
| IgM (mg/dl) | | 102.6±47.1 | 108.5±42.8 | 0.387 |
| IgE (IU/ml) | | 129.6±245.1 | 143±215.2 | 0.714 |
| C3; Complement 3, C4; Complement 4, CRP; C-reactive protein, ESR; erythrocyte sedimentation rate, GI; gastrointestinal, HSP; Henoch Schönlein Purpura, Ig; Immunoglobulin, SD; standard deviation.  Significant p values (<0.05) are given in bold. | | | | |
